# Supplementary material
Source: PubMed Central journal article supplement (PMC7659579)
Supplement: mmc1.pdf [file mmc1.pdf]

**Cell Reports Medicine, Volume 1**

**Supplemental Information**

**Cystic Fibrosis Lung Transplant Recipients Have  
Suppressed Airway Interferon Responses  
during *Pseudomonas* Infection**

**Daniel T. Dugger, Monica Fung, Lorna Zlock, Saharai Caldera, Louis Sharp, Steven R. Hays, Jonathan P. Singer, Lorriana E. Leard, Jefferey A. Golden, Rupal J. Shah, Jasleen Kukreja, Erin Gordon, Walter Finkbeiner, Mary Ellen Kleinhenz, Chaz Langelier, and John R. Greenland**

## SUPPLEMENTAL TABLES & FIGURES

**Table ST1: Longitudinal CLAD-Survival Cohort**  
(Related to Human Subjects in STAR Methods and Figure 1)

|                                           | CF-           | CF+           | p-value |
|-------------------------------------------|---------------|---------------|---------|
| <b>N (%)</b>                              | 362 (91.4)    | 34 (8.6)      |         |
| <b>Recipient Age, mean (SD)</b>           | 58.20 (10.23) | 36.01 (11.15) | <0.001  |
| <b>Donor Age, mean (SD)</b>               | 34.31 (14.79) | 30.82 (12.25) | 0.196   |
| <b>Transplant Indication Category (%)</b> |               |               | <0.001  |
| <b>A (Obstructive)</b>                    | 59 (16.6)     | 0 (0)         |         |
| <b>B (Pulm. Vascular)</b>                 | 16 (4.5)      | 0 (0)         |         |
| <b>C (CF)</b>                             | 0 (0)         | 34 (100)      |         |
| <b>D (Restrictive)</b>                    | 281 (78.9)    | 0 (0)         |         |
| <b>Recipient Gender Male (%)</b>          | 210 (59.0)    | 17 (53.1)     | 0.647   |
| <b>Donor Gender Male (%)</b>              | 217 (61.0)    | 27 (84.4)     | 0.015   |
| <b>Recipient Ethnicity (%)</b>            |               |               | 0.015   |
| <b>White</b>                              | 239 (67.1)    | 29 (90.6)     |         |
| <b>Black</b>                              | 28 (7.9)      | 3 (9.4)       |         |
| <b>Hispanic</b>                           | 64 (18.0)     | 0 (0)         |         |
| <b>Other</b>                              | 25 (7.0)      | 0 (0)         |         |
| <b>Donor Ethnicity (%)</b>                |               |               | 0.001   |
| <b>White</b>                              | 164 (46.1)    | 15 (46.9)     |         |
| <b>Black</b>                              | 28 (7.9)      | 9 (28.1)      |         |
| <b>Hispanic</b>                           | 115 (32.3)    | 7 (21.9)      |         |
| <b>Other</b>                              | 49 (13.8)     | 1 (3.1)       |         |
| <b>Transplant Type (%)</b>                |               |               | 0.177   |
| <b>Double-Lung</b>                        | 321 (90.2)    | 32 (100)      |         |
| <b>Single-Lung</b>                        | 27 (7.6)      | 0 (0)         |         |
| <b>Heart-Lung</b>                         | 8 (2.2)       | 0 (0)         |         |
| <b>HLA mismatches, mean (SD)</b>          | 4.62 (1.16)   | 4.78 (1.04)   | 0.45    |
| <b>CMV Status (%)</b>                     |               |               | 0.385   |
| <b>Donor +, Recipient -</b>               | 101 (28.4)    | 9 (28.1)      |         |
| <b>Donor +, Recipient +</b>               | 138 (38.8)    | 9 (28.1)      |         |
| <b>Other</b>                              | 117 (32.9)    | 14 (43.8)     |         |
| <b>PsA+ cultures, mean (SD)</b>           | 0.19 (0.65)   | 1.47 (1.88)   | <0.001  |

**Table ST2: Transcriptome and Metagenome Cohort**  
(Related to Figure 1 and STAR Methods Human Subjects)

|                                                     | CF+PsA+     | CF+PsA-     | CF-PsA-     | CF-PsA+     | p-value |
|-----------------------------------------------------|-------------|-------------|-------------|-------------|---------|
| <b>N</b>                                            | 9           | 6           | 9           | 6           |         |
| <b>Recipient Age, mean (SD)</b>                     | 32.2 (10.8) | 39.3 (8.2)  | 59.6 (8.1)  | 59.5 (9.6)  | <0.001  |
| <b>Donor Age, mean (SD)</b>                         | 27.3 (10.0) | 32.8 (9.1)  | 37.2 (16.7) | 37.5 (15.3) | 0.72    |
| <b>Transplant Indication (%)</b>                    |             |             |             |             | <0.001  |
| <b>A (Obstructive)</b>                              | 0 (0)       | 0 (0)       | 2 (22.2)    | 1 (16.7)    |         |
| <b>B (Pulm. Vascular)</b>                           | 0 (0)       | 0 (0)       | 0 (0)       | 0 (0)       |         |
| <b>C (CF)</b>                                       | 9 (100)     | 6 (100)     | 0 (0)       | 0 (0)       |         |
| <b>D (Restrictive)</b>                              | 0 (0)       | 0 (0)       | 7 (77.8)    | 5 (83.3)    |         |
| <b>Recipient Gender Male (%)</b>                    | 4 (44.4)    | 2 (33.3)    | 6 (66.7)    | 5 (83.3)    | 0.556   |
| <b>Donor Gender Male (%)</b>                        | 7 (77.8)    | 6 (100)     | 5 (55.6)    | 5 (83.3)    | 0.643   |
| <b>Recipient Ethnicity (%)</b>                      |             |             |             |             | 0.561   |
| <b>White</b>                                        | 7 (77.8)    | 6 (100)     | 5 (55.6)    | 3 (50.0)    |         |
| <b>Black</b>                                        | 2 (22.2)    | 0 (0)       | 2 (22.2)    | 2 (33.3)    |         |
| <b>Hispanic</b>                                     | 0 (0)       | 0 (0)       | 1 (11.1)    | 1 (16.7)    |         |
| <b>Other</b>                                        | 0 (0)       | 0 (0)       | 1 (11.1)    | 0 (0)       |         |
| <b>Donor Ethnicity (%)</b>                          |             |             |             |             | 0.296   |
| <b>White</b>                                        | 3 (33.3)    | 4 (66.7)    | 2 (22.2)    | 2 (33.3)    |         |
| <b>Black</b>                                        | 2 (22.2)    | 2 (33.3)    | 1 (11.1)    | 1 (16.7)    |         |
| <b>Hispanic</b>                                     | 4 (44.4)    | 0 (0)       | 4 (44.4)    | 1 (16.7)    |         |
| <b>Other</b>                                        | 0 (0)       | 0 (0)       | 2 (22.2)    | 2 (33.3)    |         |
| <b>Transplant Type (%)</b>                          |             |             |             |             |         |
| <b>Double-Lung</b>                                  | 9 (100)     | 6 (100)     | 9 (100)     | 6 (100)     |         |
| <b>Single-Lung</b>                                  | 0 (0)       | 0 (0)       | 0 (0)       | 0 (0)       |         |
| <b>Heart-Lung</b>                                   | 0 (0)       | 0 (0)       | 0 (0)       | 0 (0)       |         |
| <b>HLA mismatches, mean (SD)</b>                    | 4.9 (1.1)   | 4.3 (0.8)   | 4.8 (1.1)   | 4.3 (1.4)   | 0.674   |
| <b>CMV Status (%)</b>                               |             |             |             |             | 0.948   |
| <b>Donor +, Recipient -</b>                         | 3 (33.3)    | 2 (33.3)    | 3 (33.3)    | 2 (33.3)    |         |
| <b>Donor +, Recipient +</b>                         | 2 (22.2)    | 2 (33.3)    | 3 (33.3)    | 3 (50.0)    |         |
| <b>Other</b>                                        | 4 (44.4)    | 2 (33.3)    | 3 (33.3)    | 1 (16.7)    |         |
| <b>Years post-transplant, mean (SD)</b>             | 1.56 (2.59) | 1.84 (2.50) | 1.23 (1.80) | 2.71 (1.78) | 0.636   |
| <b>Bronchoscopy data</b>                            |             |             |             |             |         |
| <b>Surveillance</b>                                 | 6 (66.7)    | 3 (50.0)    | 8 (88.9)    | 1 (16.7)    | 0.041   |
| <b>Acute Symptoms</b>                               | 1 (11.1)    | 2 (33.3)    | 0 (0)       | 2 (33.3)    | 0.221   |
| <b>Fever, cough, or dyspnea</b>                     | 1 (11.1)    | 2 (33.3)    | 3 (33.3)    | 3 (50.0)    | 0.432   |
| <b>Follow up for rejection or infection</b>         | 2 (22.2)    | 0 (0)       | 2 (22.2)    | 4 (66.7)    | 0.064   |
| <b>Treated for infection</b>                        | 4 (44.4)    | 2 (33.3)    | 3 (33.3)    | 6(100.0)    | 0.051   |
| <b>Mucoid PsA</b>                                   | 7 (78.8)    |             |             | 0 (0)       | 0.015   |
| <b>PsA pre transplant (Yes/No/Unknown)</b>          | 6/1/2       |             |             | 0/2/4       | 0.036   |
| <b>Mucoid concordant PsA (Yes/No/NA)</b>            | 5/1/3       |             |             | 0/0/6       | 0.036   |
| <b>Acute cellular rejection, A-grade &gt;0, (%)</b> | 1 (13)      | 1 (17)      | 2 (22)      | 0 (0)       | 0.768   |
| <b>Lymphocytic bronchiolitis, B-grade &gt;0 (%)</b> | 0 (0)       | 0 (0)       | 1 (11)      | 0 (0)       | 0.557   |

**Table ST4: DNA Methylation Cohort**  
(Related to Figure 3 and STAR Methods Human Subjects)

|                                      | <b>CF</b>   | <b>Restrictive</b> | <b>p-value</b> |
|--------------------------------------|-------------|--------------------|----------------|
| <b>N</b>                             | 5           | 12                 |                |
| <b>Recipient Age, mean (SD)</b>      | 25.0 (2.7)  | 61.2 (9.1)         | <0.001         |
| <b>Donor Age, mean (SD)</b>          | 31.4 (11.0) | 37.04 (17.4)       | 0.723          |
| <b>Transplant Indication (%)</b>     |             |                    | <0.001         |
| <b>C (CF)</b>                        | 5 (100)     | 0 (0)              |                |
| <b>D (Restrictive)</b>               | 0 (0)       | 12 (100)           |                |
| <b>Recipient Gender Male (%)</b>     | 1 (20.0)    | 8 (66.7)           | 0.182          |
| <b>Donor Gender Male (%)</b>         | 4 (80.0)    | 9 (75.0)           | 0.478          |
| <b>Recipient Ethnicity (%)</b>       |             |                    | 0.632          |
| <b>White</b>                         | 4 (80.0)    | 10 (83.3)          |                |
| <b>Black</b>                         | 1 (20.0)    | 0 (0)              |                |
| <b>Hispanic</b>                      | 0 (0)       | 2 (16.7)           |                |
| <b>Other</b>                         | 0 (0)       | 0 (0)              |                |
| <b>Donor Ethnicity (%)</b>           |             |                    | 0.812          |
| <b>White</b>                         | 4 (80.0)    | 6 (50.0)           |                |
| <b>Black</b>                         | 0 (0)       | 1 (8.3)            |                |
| <b>Hispanic</b>                      | 1 (20.0)    | 3 (25.0)           |                |
| <b>Other</b>                         | 0 (0)       | 2 (16.7)           |                |
| <b>Transplant Type (%)</b>           |             |                    | 0.78           |
| <b>Double-Lung</b>                   | 5 (100)     | 12 (100)           |                |
| <b>Single-Lung</b>                   | 0 (0)       | 0 (0)              |                |
| <b>Heart-Lung</b>                    | 0 (0)       | 0 (0)              |                |
| <b>HLA mismatches, mean (SD)</b>     | 4.60 (0.89) | 4.45 (1.21)        | 0.872          |
| <b>CMV Status (%)</b>                |             |                    | 0.492          |
| <b>Donor +, Recipient -</b>          | 0 (0)       | 5 (41.7)           |                |
| <b>Donor +, Recipient +</b>          | 3 (60.0)    | 3 (25.0)           |                |
| <b>Other</b>                         | 2 (40.0)    | 4 (33.3)           |                |
| <b><i>P. aeruginosa</i> positive</b> | 4 (80.0)    | 2 (16.7)           | 0.028          |

**Supplement Figure SF1**

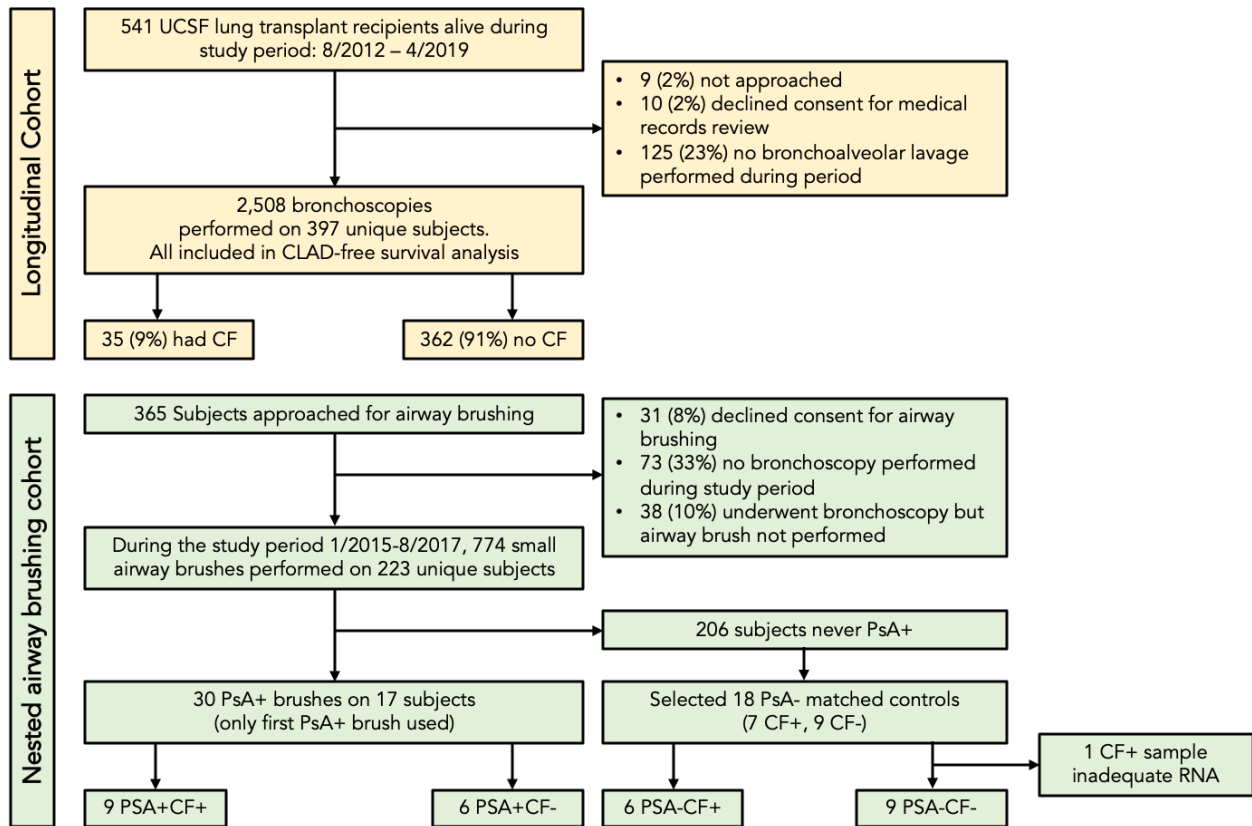

**Supplement Figure SF1. CONSORT flow diagram of subject enrollment and allocation.** The longitudinal cohort is shown in yellow and airway brushing cohort in green. Airway brushing was performed on consecutive consenting recipients at least 6 weeks from transplant at the provider’s discretion. Brushing was performed in 81% of eligible surveillance bronchoscopies, and 56% of cases with acute symptoms. Related to Human Subjects the STAR Methods.

**Supplemental Figure SF2**

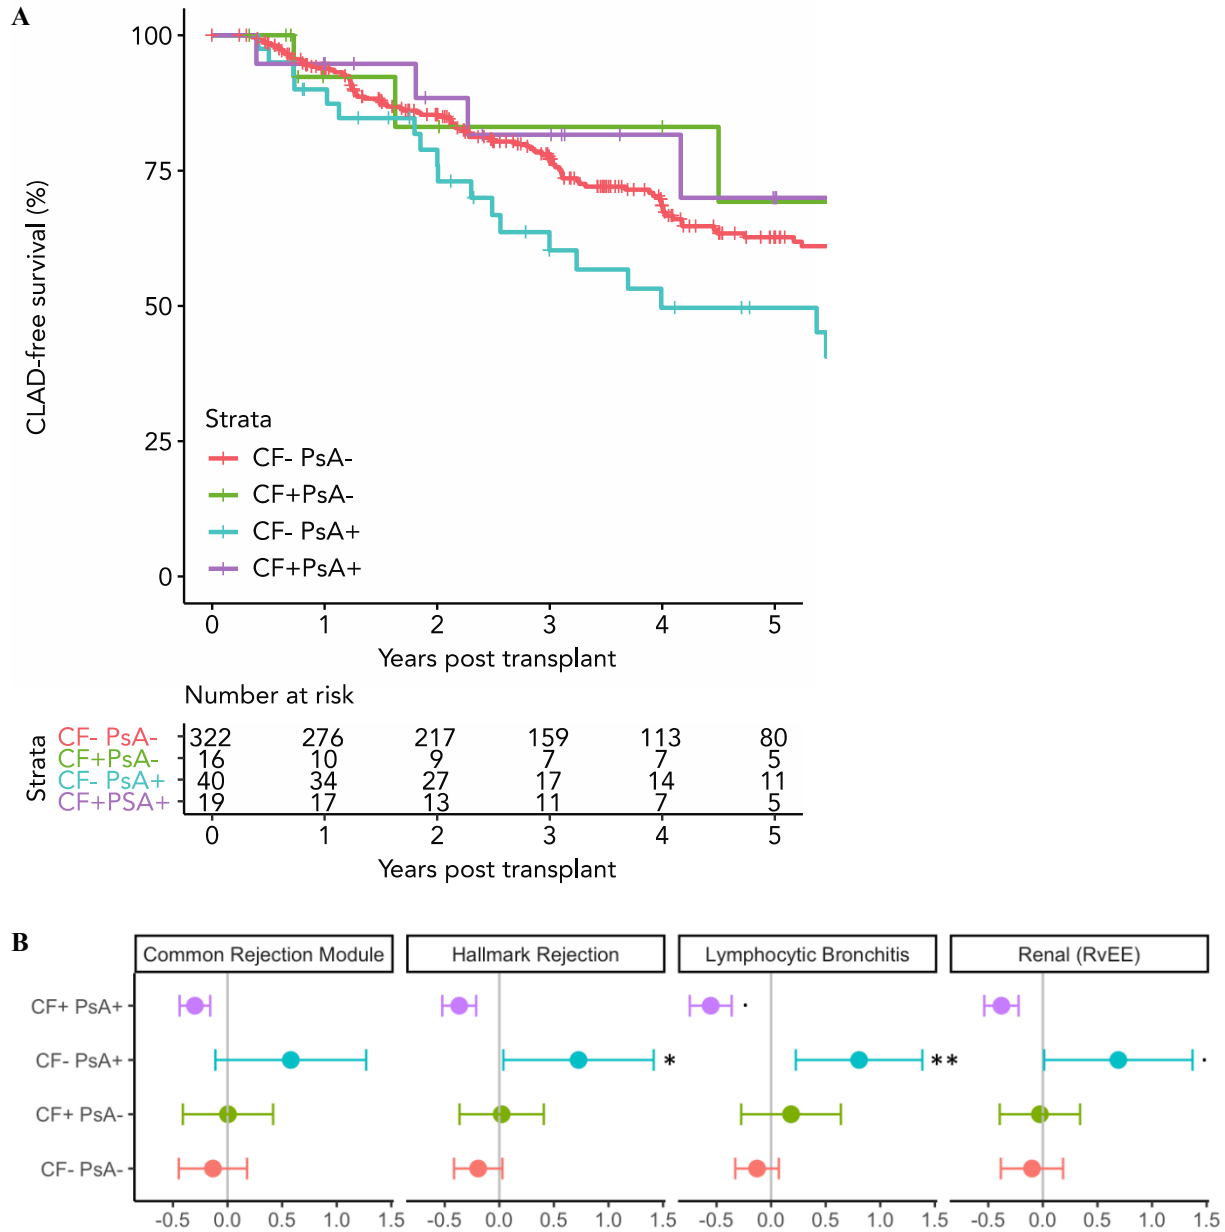

**Supplemental Figure SF2. (A) Kaplan-Meier analysis of CLAD-free survival stratified by CF and PsA status.** Shown is time to CLAD or death for the 397 subjects stratified by CF as the indication for lung transplantation and the presence of PsA detected in bronchoalveolar lavage fluid at any time post-transplantation. Statistics are not calculated for this model because of the time-dependent nature of PsA status. **(B) RNA-Seq gene signatures for rejection in airway brushes from subjects stratified by CF and PsA status.** Z-scores for mean and standard error of the sum of normalized counts for genes in select Broad Hallmark airway epithelial cell gene sets are shown for each group (General Linear Model; • p<0.1, \* p<0.05, \*\* p<0.01). These figures are related to Figure 1. (CF-PsA- n=9, CF+PsA- n=6, CF-PsA+ n=6, CF+PsA+ n=9).

Supplement Figure SF3

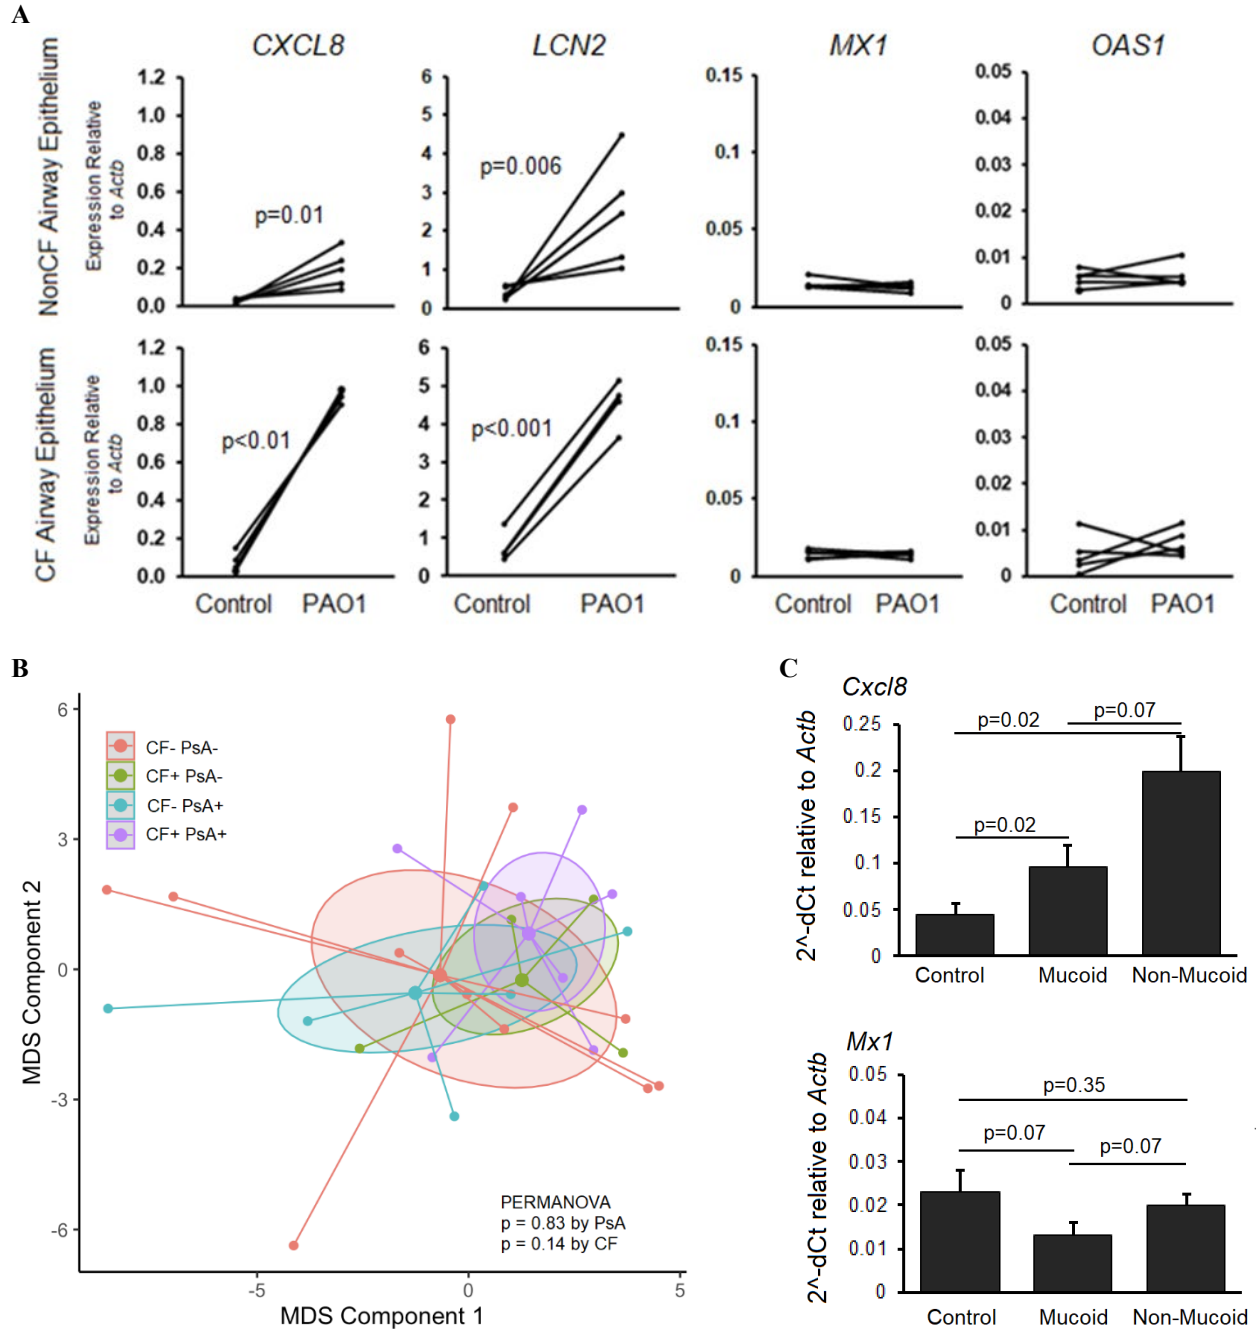

**Supplemental Figure SF3. (A) Native AEC response to PAO1, heat-killed laboratory strain of *P. aeruginosa*.** PAO1 significantly induced transcription of *CXCL8* and *LCN2* in CF and non-CF AEC. The difference between control and PAO1 in *CXCL8* ( $P < 0.0001$ ) and *LCN2* ( $P = 0.02$ ) induction was greater in the CF as compared to non-CF AEC. Neither *MX1* nor *OAS1* were induced by PAO1. Expression is  $2^{-\Delta\text{Ct}}$  relative to *ACTB*. Related to Figure 2. (n=5 control, n=5 PAO1 paired analysis). **(B and C) PsA Characteristics in CF and Lung Transplantation. (B)** MDS plot showing comparisons of Beta-Diversity measure by CF and PsA status (CF-PsA- n=9, CF+PsA- n=6, CF-PsA+ n=6, CF+PsA+ n=9). **(C)** Control media, clinical mucooid PsA, or clinical non-mucooid PsA used to stimulate normal ALI AEC for 24hr before RT-PCR measurement of relative *CXCL8* and *MX1* expression referenced to *ACTB* ( $2^{-\Delta\text{Ct}}$ ). Mucoidity of PsA did not result in differential responses *in vitro* (n=5 control, n=5 mucooid, n=5 non-mucooid paired analysis). Related to Figure 4.

## Supplement Figure SF4

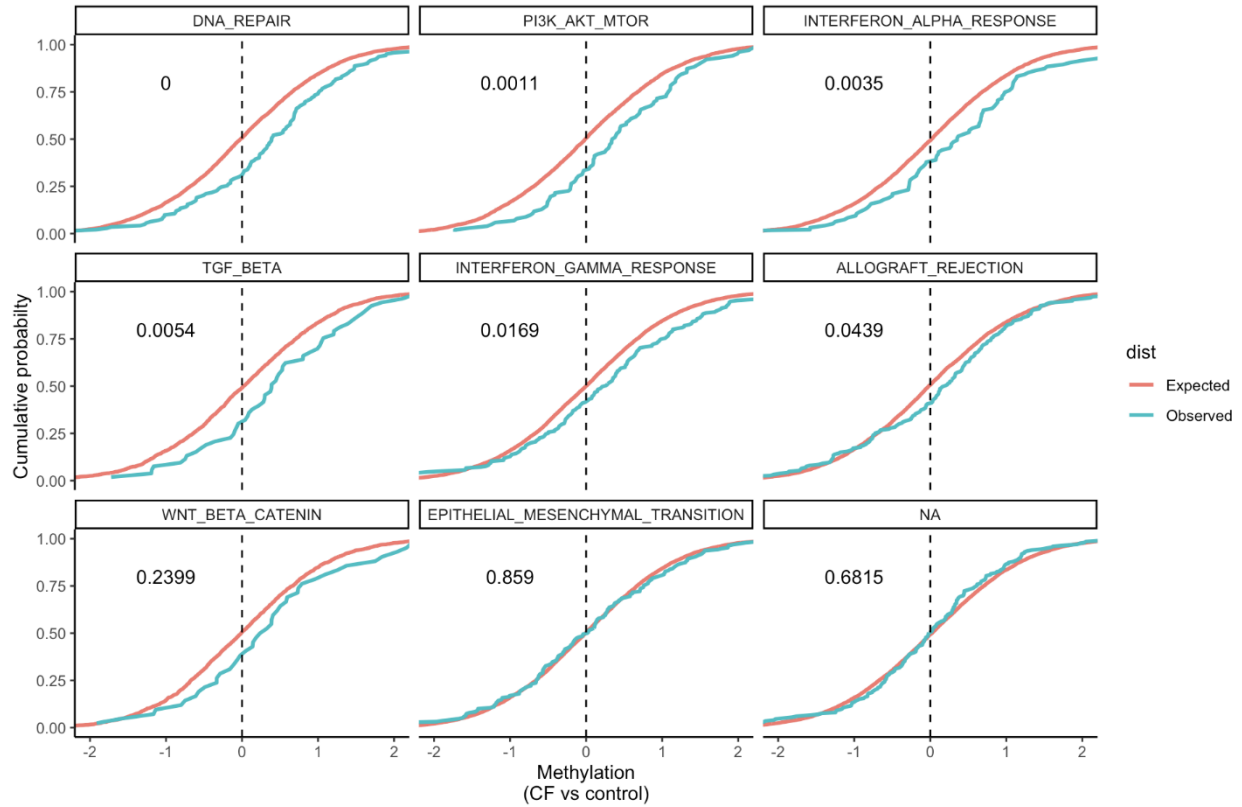

**Supplemental Figure SF4. Kolmogorov-Smirnoff plot for expected DNA methylation distribution.** Promoters of several curated gene sets and a random sample (NA) of genes showed a distribution that matched the expected distribution while other pathways were found to be hypermethylated in CF subjects. A random sampling of genes showed no difference in promoter DNA methylation between CF (n=5) and non-CF (n=12) subjects. Related to Figure 3.
